# Supplementary material
Source: PubMed Central journal article supplement (PMC2253677)
Supplement: NIHMS38529-supplement-01.pdf [file NIHMS38529-supplement-01.pdf]

## Supplemental Data

### Synergistic Function of E2F7 and E2F8 Is Essential for Cell Survival and Embryonic Development

Jing Li, Cong Ran, Edward Li, Faye Gordon, Grant Comstock, Hasan Siddiqui, Whitney Cleghorn, Hui-zi Chen, Karl Kornacker, Chang-Gong Liu, Shusil K. Pandit, Mehrbod Khanizadeh, Michael Weinstein, Gustavo Leone, and Alain de Bruin

#### Supplemental Experimental Procedures

##### Electromobility Shift Assay (EMSA) for DNA Binding

EMSAs were performed as described before (Maiti et al., 2005). Briefly, E2F7 proteins were translated *in vitro* using the TNT Quick coupled transcription/translation system (Promega) following the manufacturer's protocol. The fragment of the adenoviral E2 promoter containing two E2F-binding sites was used as a probe for binding under conditions previously described. LightShift chemiluminescent EMSA kit (Pierce) was employed for visualization and detection.

##### Cell Proliferation Assay

To measure the proliferation of cre-treated *wild type* and  $E2f7^{loxP/loxP}E2f8^{loxP/loxP}$  primary cells,  $2 \times 10^5$  MEF cells were seeded in 60mm dishes and counted daily in triplicate for 7 days using a Beckton Dickson Coulter Counter.

## Supplemental References

- Ahmed, A., Dunk, C., Ahmad, S., and Khaliq, A. (2000). Regulation of placental vascular endothelial growth factor (VEGF) and placenta growth factor (PIGF) and soluble Flt-1 by oxygen--a review. *Placenta. Suppl A*, S16-24.
- Alam, S.M., Konno, T., Dai, G., Lu, L., Wang, D., Dunmore, J.H., Godwin, A.R., and Soares, M.J. (2006). A uterine decidual cell cytokine ensures pregnancy-dependent adaptations to a physiological stressor. *Development. 134*, 407-415.
- Bao, D., Pang, Z., Morgan, M.A., Parris, J., Rong, Y., Li, L., and Morgan, J.I. (2006). Cbln1 is essential for interaction-dependent secretion of Cbln3. *Mol Cell Biol. 26*, 9327-9337.
- Beale, E.G., Harvey, B.J., and Forest, C. (2007). PCK1 and PCK2 as candidate diabetes and obesity genes. *Cell Biochem Biophys. 48*, 89-95.
- Beyaert, R., Heyninck, K., and Van Huffel, S. (2000). A20 and A20-binding proteins as cellular inhibitors of nuclear factor-kappa B-dependent gene expression and apoptosis. *Biochem Pharmacol. 60*, 1143-1151.
- Budanov, A.V., Sablina, A.A., Feinstein, E., Koonin, E.V., and Chumakov, P.M. (2004). Regeneration of peroxiredoxins by p53-regulated sestrins, homologs of bacterial AhpD. *Science. 304*, 596-600.
- Budanov, A.V., Shoshani, T., Faerman, A., Zelin, E., Kamer, I., Kalinski, H., Gorodin, S., Fishman, A., Chajut, A., Einat, P. et al. (2002). Identification of a novel stress-responsive gene Hi95 involved in regulation of cell viability. *Oncogene. 21*, 6017-6031.
- Cao, D., Leffert, J.J., McCabe, J., Kim, B., and Pizzorno, G. (2005). Abnormalities in uridine homeostatic regulation and pyrimidine nucleotide metabolism as a consequence of the deletion of the uridine phosphorylase gene. *J Biol Chem. 280*, 21169-21175.
- Chan, C.S., Harvey, M.B., and Clements, J.A. (1999). Temporal and tissue-specific expression of kallikrein (Klk) genes and identification of a novel Klk messenger ribonucleic acid transcript during early development in the mouse. *Biol Reprod. 61*, 621-628.

- Chen, L., Fink, T., Ebbesen, P., and Zachar, V. (2006). Temporal transcriptome of mouse ATDC5 chondroprogenitors differentiating under hypoxic conditions. *Exp Cell Res.* 312, 1727-1744.
- Chesney, J. (2006). 6-phosphofructo-2-kinase/fructose-2,6-bisphosphatase and tumor cell glycolysis. *Curr Opin Clin Nutr Metab Care.* 9, 535-539.
- Csiszar, K. (2001). Lysyl oxidases: a novel multifunctional amine oxidase family. *Prog Nucleic Acid Res Mol Biol.* 70, 1-32.
- Dowler, S., Currie, R.A., Campbell, D.G., Deak, M., Kular, G., Downes, C.P., and Alessi, D.R. (2000). Identification of pleckstrin-homology-domain-containing proteins with novel phosphoinositide-binding specificities. *Biochem J.* 351, 19-31.
- Emerson, M.R., Samson, F.E., and Pazdernik, T.L. (2000). Effects of hypoxia preconditioning on expression of metallothionein-1,2 and heme oxygenase-1 before and after kainic acid-induced seizures. *Cell Mol Biol.* 46, 619-626.
- Gachon, F., Olela, F.F., Schaad, O., Descombes, P., and Schibler, U. (2006). The circadian PAR-domain basic leucine zipper transcription factors DBP, TEF, and HLF modulate basal and inducible xenobiotic detoxification. *Cell Metab.* 4, 25-36.
- Giudice, A., Gould, J.A., Freeman, K.B., Rastan, S., Hertzog, P., Kola, I., and Iannello, R.C. (2001). Identification and characterization of alternatively spliced murine Rgs11 isoforms: genomic structure and gene analysis. *Cytogenet Cell Genet.* 94, 216-224.
- Hamamoto, R., Furukawa, Y., Morita, M., Iimura, Y., Silva, F.P., Li, M., Yagyu, R., and Nakamura, Y. (2004). SMYD3 encodes a histone methyltransferase involved in the proliferation of cancer cells. *Nat Cell Biol.* 6, 731-740.
- Ikeda, W., Kakunaga, S., Itoh, S., Shingai, T., Takekuni, K., Satoh, K., Inoue, Y., Hamaguchi, A., Morimoto, K., Takeuchi, M., et al. (2003). TAGE4/Nectin-like molecule-5 heterophilically trans-interacts with cell adhesion molecule Nectin-3 and enhances cell migration. *J Biol Chem.* 278, 28167-28172.
- Ito, D., Walker J.R., Thompson, C.S., Moroz, I., Lin, W., Veselits, M.L., Hakim, A.M., Fienberg, A.A., and Thinakaran, G. (2004). Characterization of stanniocalcin 2, a novel target of the mammalian unfolded protein response with cytoprotective properties. *Mol Cell Biol.* 24, 9456-9469.

- Jin, K., Mao, X.O., Eshoo, M.W., del Rio, G., Rao, R., Chen, D., Simon, R.P., and Greenberg, D.A. (2002). cDNA microarray analysis of changes in gene expression induced by neuronal hypoxia in vitro. *Neurochem Res.* 27, 1105-1012.
- Kasper, L.H., Boussouar, F., Boyd, K., Xu, W., Biesen, M., Rehg, J., Baudino, T.A., Cleveland, J.L., and Brindle, P.K. (2005). Two transactivation mechanisms cooperate for the bulk of HIF-1-responsive gene expression. *EMBO J.* 24, 3846-3858.
- Kasper, L.H., and Brindle, P.K. (2006). Mammalian gene expression program resiliency: the roles of multiple coactivator mechanisms in hypoxia-responsive transcription. *Cell Cycle.* 5, 142-146.
- Kearney, J.B., Kappas, N.C., Ellerstrom, C., DiPaola, F.W., and Bautch, V.L.. (2004). The VEGF receptor flt-1 (VEGFR-1) is a positive modulator of vascular sprout formation and branching morphogenesis. *Blood.* 103, 4527-4535.
- Kim, J.W., Gao, P., Liu, Y.C., Semenza, G.L., and Dang, C.V. (2007). HIF-1 and Dysregulated c-Myc Cooperatively Induces VEGF and Metabolic Switches, HK2 and PDK1. *Mol Cell Biol.* (Epub ahead of print).
- Liu, T., Laurell, C., Selivanova, G., Lundeberg, J., Nilsson, P., and Wiman, K.G. (2007). Hypoxia induces p53-dependent transactivation and Fas/CD95-dependent apoptosis. *Cell Death Differ.* 14, 411-421.
- Manjunath, S., Lee, C.H., VanWinkle, P., and Bailey-Serres, J. (1998). Molecular and biochemical characterization of cytosolic phosphoglucomutase in maize. Expression during development and in response to oxygen deprivation. *Plant Physiol.* 117, 997-1006.
- Martin-Rendon, E., Hale, S.J., Ryan, D., Baban, D., Forde, S.P., Roubelakis, M., Sweeney, D., Moukayed, M., Harris, A.L., Davies, K., et al. (2007). Transcriptional profiling of human cord blood CD133+ and cultured bone marrow mesenchymal stem cells in response to hypoxia. *Stem Cells.* 25, 1003-1012.
- Nichols, N.R. (2003). Ndr2, a novel gene regulated by adrenal steroids and antidepressants, is highly expressed in astrocytes. *Ann N Y Acad Sci.* 1007, 349-356.

- Olbryt, M., Jarzab, M., Jazowiecka-Rakus, J., Simek, K., Szala, S., and Sochanik, A. (2006). Gene expression profile of B 16(F10) murine melanoma cells exposed to hypoxic conditions in vitro. *Gene Expr.* *13*, 191-203.
- Ord, J.J., Streeter, E.H., Roberts, I.S., Cranston, D., and Harris, A.L. (2005). Comparison of hypoxia transcriptome in vitro with in vivo gene expression in human bladder cancer. *Br J Cancer.* *93*, 346-354.
- Printen, J.A., Brady, M.J., and Saltiel, A.R. (1997). PTG, a protein phosphatase 1-binding protein with a role in glycogen metabolism. *Science.* *275*, 1475-1478.
- Ragel, B.T., Couldwell, W.T., Gillespie, D.L., and Jensen, R.L. (2007). Identification of hypoxia-induced genes in a malignant glioma cell line (U-251) by cDNA microarray analysis. *Neurosurg Rev.* *30*, 181-187.
- Samaras, S.E., Shi, Y., and Davidson, J.M. (2006). CARP: fishing for novel mechanisms of neovascularization. *J Investig Dermatol Symp Proc.* *11*, 124-131.
- Schwarzer, R., Tondera, D., Arnold, W., Giese, K., Klippel, A., and Kaufmann, J. (2005). REDD1 integrates hypoxia-mediated survival signaling downstream of phosphatidylinositol 3-kinase. *Oncogene.* *24*, 1138-1149.
- Siep, M., Sleddens-Linkels, E., Mulders, S., van Eenennaam, H., Wassenaar, E., Van Cappellen, W.A., Hoogerbrugge, J., Grootegoed, J.A., and Baarends, W.M. (2004). Basic helix-loop-helix transcription factor Tcf15 interacts with the Calmegin gene promoter in mouse spermatogenesis. *Nucleic Acids Res.* *32*, 6425-6436.
- Thacker, J. (1999). The role of homologous recombination processes in the repair of severe forms of DNA damage in mammalian cells. *Biochimie.* *81*, 77-85.
- Tomotsune, D., Takihara, Y., Berger, J., Duhl, D., Joo, S., Kyba, M., Shirai, M., Ohta, H., Matsuda, Y., Honda, B.M., et al. (1999). A novel member of murine Polycomb-group proteins, Sex comb on midleg homolog protein, is highly conserved, and interacts with RAE28/mph1 in vitro. *Differentiation.* *65*, 229-239.
- van Leuven, F., Torrekens, S., Overbergh, L., Lorent, K., de Strooper, B., and van den Berghe, H. (1992). The primary sequence and the subunit structure of mouse alpha-2-macroglobulin, deduced from protein sequencing of the isolated subunits and from molecular cloning of the cDNA. *Eur J Biochem.* *210*, 319-327.

- van Rompay, A.R., Norda, A., Linden, K., Johansson, M., and Karlsson, A. (2001). Phosphorylation of uridine and cytidine nucleoside analogs by two human uridine-cytidine kinases. *Mol Pharmacol.* 59, 1181-1186.
- Wu, E.H., Li, H.S., Zhao, T., Fan, J.D., Ma, X., Xiong, L., Li, W.J., Zhu, L.L., and Fan, M. (2007). Effect of hypoxia on the gene profile of human bone marrow-derived mesenchymal stem cells. *Sheng Li Xue Bao.* 59, 227-232.
- Yang, W., Li, C., and Mansour, S.L. (2001). Impaired motor coordination in mice that lack punc. *Mol Cell Biol.* 21, 6031-6043.
- Zhang, J.Z., Behrooz, A., and Ismail-Beigi, F. (1999). Regulation of glucose transport by hypoxia. *Am J Kidney Dis.* 34, 189-202.
- Zhang, X.M., Dormady, S.P., Chaung, W., and Basch, R.S. (2000). mVH1, a dual-specificity phosphatase whose expression is cell cycle regulated. *Mamm Genome.* 11, 1154-1156.
- Zhu, Y., McAvoy, S., Kuhn, R., and Smith, D.I. (2006). RORA, a large common fragile site gene, is involved in cellular stress response. *Oncogene.* 25, 2901-2908.

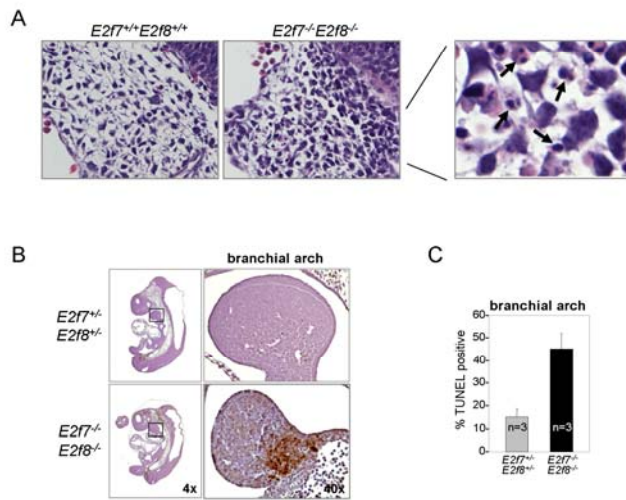

**Figure S1.** Inactivation of *E2f7* and *E2f8* Induces Massive Apoptosis in E9.5 Embryos

(A) H&E staining of E9.5 embryo mesenchymal tissues. The right panel highlights the nuclear morphology of mesenchymal cells in *E2f7*<sup>-/-</sup>*E2f8*<sup>-/-</sup> embryos; black arrows point to examples of pyknotic nuclei. (B) Formalin fixed sections of embryos with the indicated genotypes were analyzed by TUNEL assays. Far left panels: low magnification pictures of whole embryos. Right panel: high magnification images of representative areas demarcated by the box in the low magnification images. (C) Quantification of TUNEL-positive cells in the branchial arch areas is presented as the average  $\pm$  SD percentage of cells that are TUNEL-positive. Three sections per embryo and three different embryos for each genotype were analyzed.

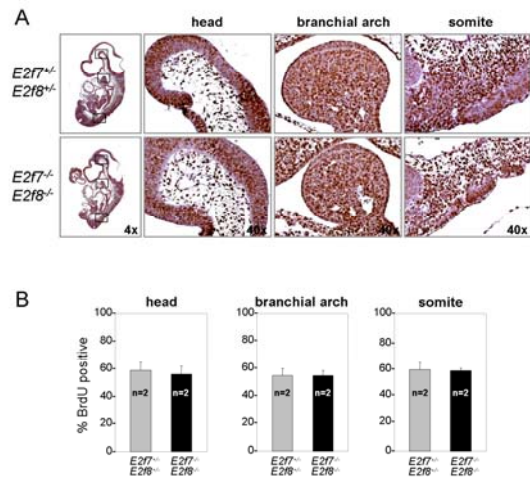

**Figure S2.** Inactivation of *E2f7* and *E2f8* Does Not Affect BrdU Incorporation In Vivo

(A) BrdU staining of embryos with the indicated genotypes. Far left panels: low magnification pictures of whole embryos. Right three panels: high magnification images of representative areas demarcated by the box in the low magnification images. (B) Quantification of proliferation in different tissue areas of embryos is presented as the average  $\pm$  SD percentage of cells that are BrdU-positive. Three sections per embryo and two different embryos were counted for each genotype group.



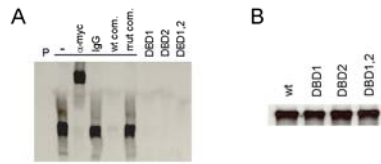

**Figure S3.** DNA Binding Mutations Abolish the DNA Binding Activity of E2F7

(A) EMSAs of *in vitro* translated myc-tagged *wild type* or mutant forms of E2F7 containing amino acid substitutions (Maiti et al., 2005) in the indicated DNA binding domains (DBD1, DBD2, DBD1,2) using a biotin-labeled E2 DNA probe. *In vitro* translated reactions of *wild type* E2F7 were incubated with mock buffer (-), anti-myc or IgG antibodies as indicated, or incubated with an unlabeled *wild type* (wt com.) or mutant E2 (mut com.) probe. (B) Western blot of *in vitro* translated *wild type* or mutant forms of myc-tagged E2F7 using anti-myc antibodies.

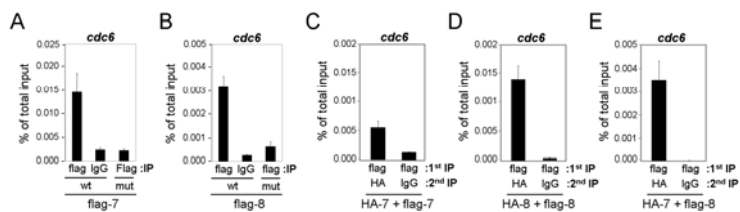

**Figure S4.** E2F7 and E2F8 Bind to the *cdc6* Promoter

(A-E) The same chromatin-immunoprecipitated DNA that was used and described in Figure 4F-J was amplified using primers specific for the *cdc6* promoter. Real-time PCR was performed in triplicate and cycle numbers were normalized to 1% of the input DNA.

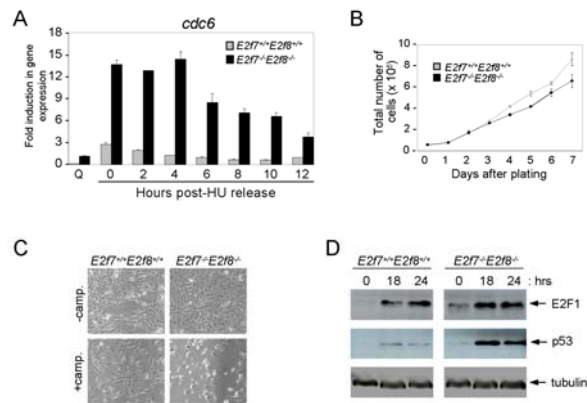

**Figure S5.** MEFs Deficient in *E2f7* and *E2f8* Are Hypersensitive to DNA Damage Induced Apoptosis

(A) Total RNA isolated from same synchronized MEFs samples as in Figure 4F was analyzed by real-time RT-PCR assays specific for *cdc6* expression. (B) Growth curve of cre-treated *E2f7<sup>+/+</sup>E2f8<sup>+/+</sup>* and *E2f7<sup>loxP/loxP</sup>E2f8<sup>loxP/loxP</sup>* MEFs. Cells were plated and viable cells counted daily in triplicate. For convenience, cre-deleted *loxP* alleles were labeled as (-/-). (C) Light microscopy images of MEFs treated as in Figure 4G at 72h. (D) Lysates derived from MEFs treated as in Figure 4G were analyzed by Western blotting using E2F1 and p53 specific antibodies. Tubulin-specific antibodies were used as an internal loading control.

| Gene                       | Fold induction (log2) | Function                                                                         | Reference                                                                 |
|----------------------------|-----------------------|----------------------------------------------------------------------------------|---------------------------------------------------------------------------|
|                            |                       | <b>Stress Related</b>                                                            |                                                                           |
| <i>Stc2</i>                | 3.91                  | hypoxia, nutrient response, calcium and phosphate homeostasis                    | Ito et al., 2004                                                          |
| <i>Ier3</i>                | 3.26                  | hypoxia response, apoptosis                                                      | Chen et al., 2006                                                         |
| <i>Pdk1</i>                | 2.96                  | hypoxia response, carbohydrate metabolism                                        | Kim et al., 2007                                                          |
| <i>Bhlhb2</i>              | 2.92                  | hypoxia, genotoxic, DNA damage response, apoptosis                               | Olbryt et al., 2006                                                       |
| <i>Trib3</i>               | 2.83                  | hypoxia, nutrient response, insulin signaling and glucose homeostasis, apoptosis | Wu et al., 2007                                                           |
| <i>Ddit4</i>               | 2.74                  | hypoxia, DNA damage response, apoptosis                                          | Schwarzer et al., 2005                                                    |
| <i>Ndr1</i>                | 2.64                  | hypoxia response, cell differentiation                                           | Jin et al., 2002; Kasper et al., 2005                                     |
| <i>Adm</i>                 | 2.64                  | hypoxia response, angiogenesis                                                   | Olbryt et al., 2006                                                       |
| <i>Vldlr</i>               | 2.42                  | hypoxia response, lipid metabolism                                               | Kasper et al., 2005                                                       |
| <i>Ndr1</i> // <i>Ndr1</i> | 2.37                  | hypoxia response, cell differentiation                                           | Jin et al., 2002; Kasper et al., 2005                                     |
| <i>Ndr1</i>                | 2.37                  | hypoxia response, cell differentiation                                           | Jin et al., 2002; Kasper et al., 2005                                     |
| <i>Pfkfb3</i>              | 2.26                  | hypoxia response, glycolysis                                                     | Olbryt et al., 2006; Kasper et al., 2005                                  |
| <i>Aldoc</i>               | 2.25                  | hypoxia response, glycolysis                                                     | Olbryt et al., 2006                                                       |
| <i>Bnip3</i>               | 2.20                  | hypoxia response, apoptosis                                                      | Olbryt et al., 2006; Kasper and Brindle, 2006; Martin-Rendon et al., 2007 |
| <i>Pkp2</i>                | 2.17                  | hypoxia response, adhesion                                                       | Olbryt et al., 2006                                                       |
| <i>Maff</i>                | 2.16                  | hypoxia response, transcription                                                  | Chen et al., 2006; Kasper et al., 2005                                    |
| <i>Stc1</i>                | 2.15                  | nutrient, hypoxia response, calcium homeostasis                                  | Ito et al., 2004; Kasper and Brindle, 2006                                |
| <i>Eno2</i>                | 2.10                  | hypoxia response, glycolysis                                                     | Olbryt et al., 2006; Martin-Rendon et al., 2007                           |
| <i>Pfkfb3</i>              | 2.04                  | hypoxia response, glycolysis                                                     | Chesney et al., 2006                                                      |
| <i>Slc16a3</i>             | 2.03                  | hypoxia response, monocarboxylic acid transport                                  | Ord et al., 2005                                                          |
| <i>Nppb</i>                | 2.00                  | hypoxia response, cardiovascular homeostasis                                     | Olbryt et al., 2006                                                       |
| <i>Egln3</i>               | 1.98                  | hypoxia response, apoptosis                                                      | Kasper and Brindle, 2006; Kasper et al., 2005                             |
| <i>Slc2a3</i>              | 1.95                  | hypoxia response, glucose transport                                              | Ragel et al., 2007; Zhang et al., 1999                                    |
| <i>Pgm2</i>                | 1.92                  | hypoxia response, glycolysis                                                     | Manjunath et al., 1998                                                    |
| <i>2310056P07Rik</i>       | 1.91                  | hypoxia response                                                                 | Kasper et al., 2005                                                       |
| <i>Rora</i>                | 1.90                  | including hypoxia response, cGMP metabolism, transcription                       | Zhu et al., 2006                                                          |
| <i>Krt19</i>               | 1.89                  | hypoxia response, cytoskeleton organization and biogenesis                       | Kasper et al., 2005                                                       |
| <i>Ero1l</i>               | 1.86                  | hypoxia response, oxidoreductase activity                                        | Jin et al., 2002; Kasper et al., 2005                                     |
| <i>Ankrd1</i>              | 1.85                  | hypoxia response, transcription corepressor activity                             | Samaras et al., 2006                                                      |
| <i>Mt1</i>                 | 1.84                  | stress response, metal ion homeostasis                                           | Emerson et al., 2000                                                      |
| <i>Sesn2</i>               | 1.79                  | hypoxia, DNA damage response, p53-dependent apoptosis                            | Budanov et al., 2004; Budanov et al., 2002                                |
| <i>Rad51l1</i>             | 1.74                  | DNA damage response, DNA repair                                                  | Thacker, 1999                                                             |
| <i>Mt2</i>                 | 1.71                  | stress response, metal ion homeostasis                                           | Emerson et al., 2000                                                      |
| <i>Flt1</i>                | 1.65                  | hypoxia response, angiogenesis                                                   | Kearney et al., 2004; Ahmed et al., 2000                                  |
| <i>Slc2a1</i>              | 1.64                  | hypoxia response, glucose transport                                              | Kasper and Brindle, 2006; Zhang et al., 1999                              |
| <i>P4ha1</i>               | 1.63                  | hypoxia response, protein metabolism                                             | Kasper et al., 2005                                                       |
| <i>Pfkfb3</i>              | 1.61                  | hypoxia response, glycolysis                                                     | Kasper and Brindle, 2006; Kasper et al., 2005                             |

| Gene                                | Fold induction (log2) | Function                                                             | Reference                                                                           |
|-------------------------------------|-----------------------|----------------------------------------------------------------------|-------------------------------------------------------------------------------------|
| <b>Stress Related (cont.)</b>       |                       |                                                                      |                                                                                     |
| <i>Hk2</i>                          | 1.60                  | hypoxia response, glycolysis                                         | Olbryt et al., 2006; Kim et al., 2007                                               |
| <i>P4ha2</i>                        | 1.58                  | hypoxia response, protein metabolism                                 | Kasper et al., 2005                                                                 |
| <i>Tmem45a</i>                      | 1.56                  | hypoxia response                                                     | Martin-Rendon et al., 2007                                                          |
| <i>Ddit3</i>                        | 1.52                  | hypoxia, DNA damage response, p53-dependent apoptosis, transcription | Ragel et al., 2007; Jin et al., 2002; Liu et al., 2007                              |
| <i>Tnfaip3</i>                      | 1.52                  | apoptosis                                                            | Beyaert et al., 2000                                                                |
| <i>Vegfa</i>                        | 1.51                  | hypoxia response, angiogenesis                                       | Olbryt et al., 2006; Ord et al., 2005; Kim et al., 2007; Martin-Rendon et al., 2007 |
| <b>Others</b>                       |                       |                                                                      |                                                                                     |
| <i>Klk1b22</i> ///<br><i>Klk1b9</i> | 3.37                  | proteolysis                                                          | Chan et al., 1999                                                                   |
| <i>Ppp1r3c</i>                      | 2.59                  | glycogen metabolism                                                  | Printen et al., 1997                                                                |
| <i>BC064011</i>                     | 2.28                  | NADH dehydrogenase, electron transport                               |                                                                                     |
| <i>Rgs11</i>                        | 2.17                  | regulation of G-protein signaling                                    | Giudice et al., 2001                                                                |
| <i>Uck2</i>                         | 1.97                  | pyrimidine metabolism                                                | van Rompay et al., 2001                                                             |
| <i>Aox4</i>                         | 1.97                  | electron transport, oxidoreductase activity                          |                                                                                     |
| <i>Scmh1</i>                        | 1.94                  | transcription corepressor activity                                   | Tomotsune et al., 1999                                                              |
| <i>Dtprp</i>                        | 1.90                  | decidual/trophoblast prolactin-related protein                       | Alam et al., 2006                                                                   |
| <i>Plekha2</i>                      | 1.80                  | phospholipid binding                                                 | Dowler et al., 2000                                                                 |
| <i>A2m</i> ///<br><i>LOC677369</i>  | 1.73                  | protease inhibitor activity                                          | van Leuven et al., 1992                                                             |
| <i>Dbp</i>                          | 1.72                  | transcription, circadian rhythm                                      | Gachon et al., 2006                                                                 |
| <i>Smyd3</i>                        | 1.71                  | chromatin modification, proliferation                                | Hamamoto et al., 2004                                                               |
| <i>Ndrp2</i>                        | 1.68                  | nervous system development, differentiation                          | Nichols, 2003                                                                       |
| <i>Punc</i>                         | 1.66                  | neuronal cell adhesion                                               | Yang et al., 2001                                                                   |
| <i>Tcf15</i>                        | 1.59                  | transcription                                                        | Siep et al., 2004                                                                   |
| <i>St3gal1</i>                      | 1.58                  | protein amino acid glycosylation                                     |                                                                                     |
| <i>Pvr</i>                          | 1.57                  | adhesion, migration                                                  | Ikeda et al., 2003                                                                  |
| <i>Cbln3</i>                        | 1.57                  | transneuronal signaling                                              | Bao et al., 2006                                                                    |
| <i>Loxl2</i>                        | 1.54                  | oxidoreductase activity                                              | Csiszar, 2001                                                                       |
| <i>Pck2</i>                         | 1.53                  | gluconeogenesis                                                      | Beale et al., 2007                                                                  |
| <i>Upp1</i>                         | 1.52                  | nucleotide catabolism, uridine metabolism                            | Cao et al., 2005                                                                    |
| <i>Asah3l</i>                       | 1.50                  | lipid metabolism, ceramide metabolism                                |                                                                                     |
| <b>Unknown</b>                      |                       |                                                                      |                                                                                     |
| ---                                 | 3.11                  | unknown                                                              |                                                                                     |
| <i>2610528A11Rik</i>                | 3.04                  | unknown                                                              |                                                                                     |
| <i>Ankrd37</i>                      | 2.58                  | unknown                                                              |                                                                                     |
| <i>A330076H08Rik</i>                | 2.30                  | unknown                                                              |                                                                                     |
| <i>4930583H14Rik</i>                | 2.13                  | unknown                                                              |                                                                                     |
| <i>2900016B01Rik</i>                | 2.12                  | unknown                                                              |                                                                                     |
| <i>2700089E24Rik</i>                | 2.11                  | unknown                                                              |                                                                                     |

| Gene                                                            | Fold induction (log2) | Function        | Reference |
|-----------------------------------------------------------------|-----------------------|-----------------|-----------|
|                                                                 |                       | Unknown (cont.) |           |
| <i>BC062258</i>                                                 | 2.10                  | unknown         |           |
| <i>2210418010Rik</i>                                            | 2.04                  | unknown         |           |
| <i>Gm129</i>                                                    | 2.02                  | unknown         |           |
| <i>Zc3h6</i>                                                    | 1.98                  | unknown         |           |
| ---                                                             | 1.93                  | unknown         |           |
| <i>Ppp1r3g</i>                                                  | 1.89                  | unknown         |           |
| <i>4933409K07Rik</i><br>// <i>LOC545605</i> // <i>LOC665845</i> | 1.87                  | unknown         |           |
| ---                                                             | 1.73                  | unknown         |           |
| ---                                                             | 1.70                  | unknow          |           |
| <i>5830408C22Rik</i>                                            | 1.68                  | unknown         |           |
| <i>C330008K14Rik</i>                                            | 1.61                  | unknown         |           |
| ---                                                             | 1.57                  | unknown         |           |
| ---                                                             | 1.57                  | unknown         |           |
| <i>LOC676974</i>                                                | 1.56                  | unknown         |           |
| <i>B230112C05Rik</i>                                            | 1.55                  | unknown         |           |
| ---                                                             | 1.53                  | unknown         |           |

**Figure S6.** Functional Annotation of Gene Expression

Genes are indicated with their gene symbols, medium Log2-differentials between *wild type* and *E2f7<sup>-/-</sup>E2f8<sup>-/-</sup>* samples, and gene functions ([www.ncbi.nlm.nih.gov/entrez](http://www.ncbi.nlm.nih.gov/entrez)).

Based on their function annotations, 88 up-regulated genes are grouped in 3 categories and sorted in the descending order of Log2-differentials. References indicate previous reports for these genes function. For complete references list see Supplemental References.

| Gene                         | Forward Primer                | Reverse Primer                  |
|------------------------------|-------------------------------|---------------------------------|
| <b>Genotyping</b>            |                               |                                 |
| <i>E2f7</i>                  | AGGCAGCACACTTGACACG           | ACTTTTGGGACAGAGGTAGGA           |
|                              |                               | CCAAGATGAAGGCCGAGATGC TAC       |
| <i>E2f8</i>                  | TAAAAAGCTTTGCGGTCGTT          | AAGCCAACCTCGATGAATTG            |
|                              |                               | CTCGCATCATCGTCTGCTAA            |
| <b>Generating ISH Probes</b> |                               |                                 |
| <i>E2f7</i>                  | TTGGCTTAGCGGGTAGGAGACG        | GGCTGGCGGCGCTGATGAG             |
| <i>E2f8</i>                  | GTCGAATTCGGTACACCCTCTCCAAACCA | GACTCTAGAACC CGGAGTACGGGAAGAAAT |
| <b>Real-time RT-PCR</b>      |                               |                                 |
| <i>E2f7</i>                  | GCCAAGCAGGAAACAGAAGA          | ACCGTGCCAACCACTACTGAT           |
| <i>E2f8</i>                  | GAGAAATCCCAGCCGAGTC           | CATAAATCCGCCGACGTT              |
| <i>E2f1</i>                  | GCCCTTGACTATCACTTTGGTCTC      | CCTTCCCATTTTGGTCTGCTC           |
| <i>Cdc6</i>                  | AGTTCGTGCCCGCAAAGTG           | AGCAGCAAAGAGCAAACCAGG           |
| <i>Gadd45</i>                | ACGACATCAACATCCTGCGG          | CAAAGTCATCTCTGAGCCCTCG          |
| <i>Noxa</i>                  | GATGAGGAGCCCAAGCCAACC         | CCCAAACGACTGCCCCATACAA          |
| <i>Pidd</i>                  | GCACCGTGTGAATCTCATTGC         | CAGGAAGTGAACCCCGATAAAAG         |
| <i>Ndrg1</i>                 | TCTTTGAGGCGAGGGAGAA           | CAATGAAATCACACCACCA             |
| <i>Eco1L</i>                 | CCGAAAAACTGATCGCAAT           | CAGAAACAGGCACATTCCAA            |
| <i>Pfkfb</i>                 | GGTTACTTGGCCTTGGTGAG          | CGATTGCTCCTCAGACACA             |
| <i>Slc2a3</i>                | AACGTGCCCTCCTCCACTT           | GCCCCTTCCATAGCAATCT             |
| <i>Bnip3</i>                 | GGGTTTTCCCAAAGGAATA           | GACCACCAAGGTAATGGTG             |
| <i>Trib3</i>                 | ACTTGGCTGTGGGATTCAAG          | GACTGTGGGCTGGGACTA              |
| <i>Eomes</i>                 | GTGACAGAGCGGTGTGGAGG          | AGAGGAGGCCGTTGGTCTGTGG          |
| <i>Lectf1</i>                | CACCAGCAGGAAGGAGAAAG          | GGATTTACACCATGCCCAAG            |
| <b>Real-time ChIP-PCR</b>    |                               |                                 |
| <i>E2f1-promoter</i>         | CTGCCTGCAAAGTCCC GGCCACTT     | AGGAACCGCCGCGTTGTTCCCGT         |
| <i>E2f1-exon1</i>            | CGCCAGACGCCACTTCATC           | TTCATCCCTCACTCATCAACAA          |
| <i>Tubulin-promoter</i>      | ATGGAGGGATGAATGGTTATGC        | CTTTTTGGGCTGGCTCTTTTCC          |
| <i>Cdc6-promoter</i>         | AAAGGCTCTGTGACTACAGCCA        | GATCCTTCTCAGTCTCTCACA           |

**Figure S7.** Primer Sequence Information for PCR Procedures
